# Supplementary material for: Schistosoma mansoni Tegument Protein Sm29 Is Able to Induce a Th1-Type of Immune Response and Protection against Parasite Infection
Source: PubMed Central journal article supplement (PMC2553283; doi:10.1371/journal.pntd.0000308), 2008-10-01

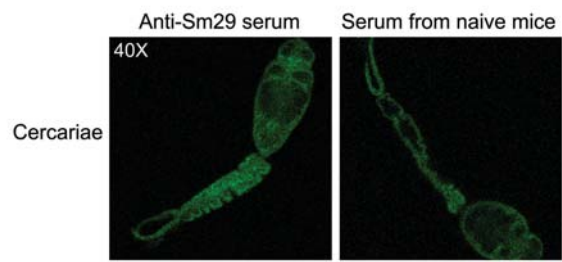

Supplement: pntd.0000308.s001.pdf [file pntd.0000308.s001.pdf]
